# Supplementary material for: Novel Cyclic Peptides from Lethal Amanita Mushrooms through a Genome-Guided Approach
Source: MDPI journal article supplement (doi:10.3390/jof7030204), 2021-03-11
Supplement: s1 [file s1]

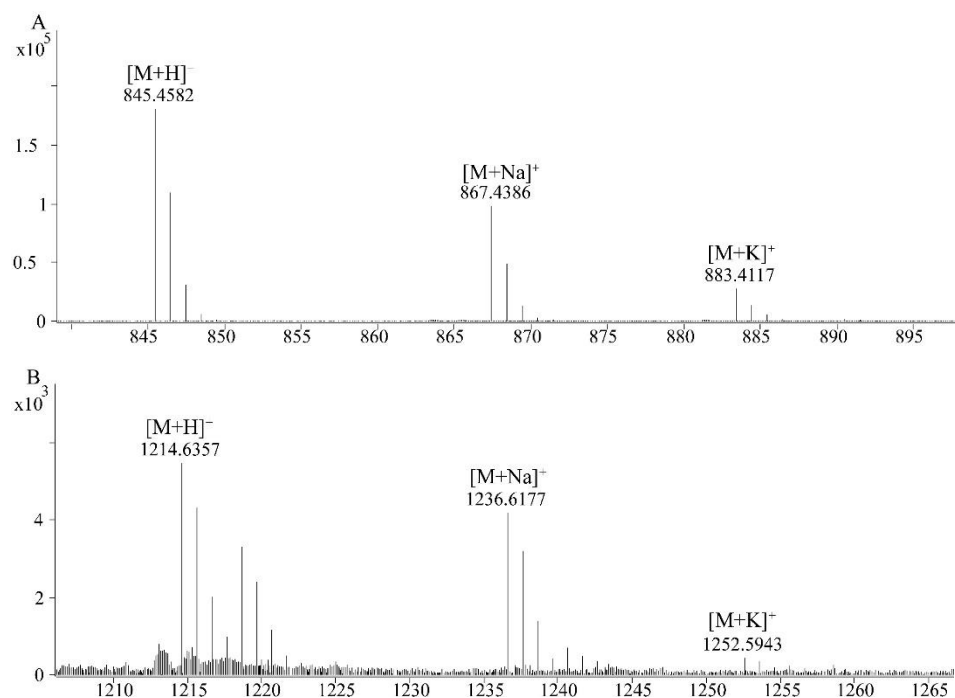

**Fig S5.** The monoisotopic masses of candidate new cyclic peptide in *Amanita exitialis*. The two molecules corresponded to the cyclized core peptide sequences of FVFVASPP (A) and LFFPPDFRPP (B). The adduct ions of  $[M+Na]^+$  and  $[M+K]^+$  were shown in each section.

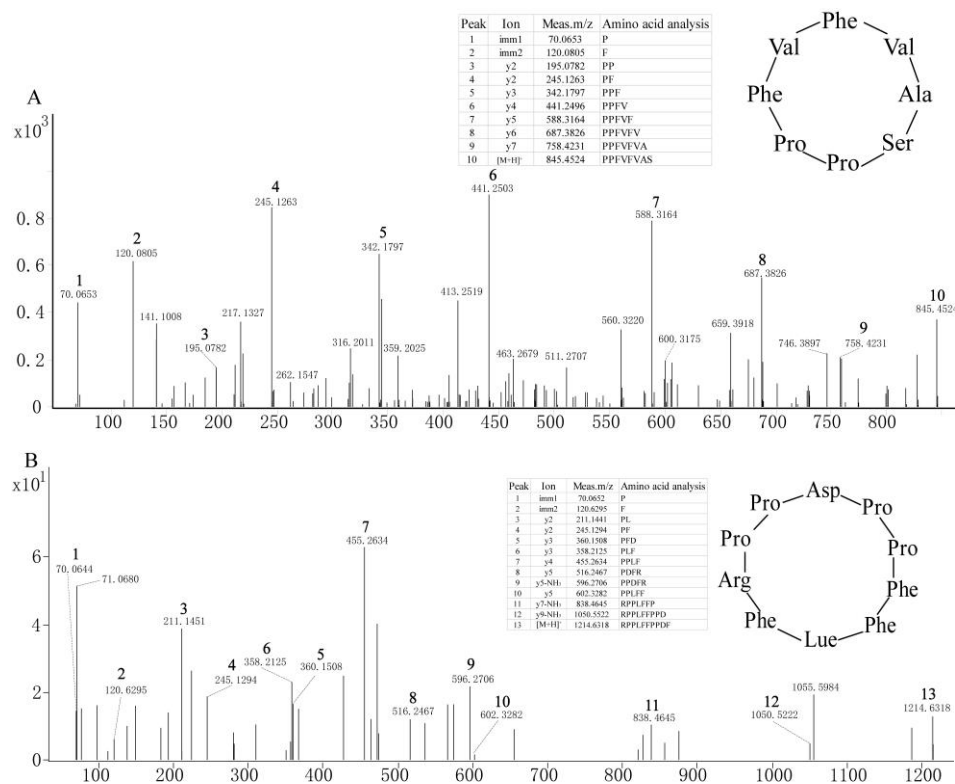

**Fig S6.** Tandem mass spectrometry of novel cyclic peptides in *Amanita exitialis*. Manual analysis of

amino acid compositions of Cyclo(FVFVASPP) (A) and Cyclo(LFFPPDFRPP) (B), with inserted tables of matched amino acids; immonium ions were shown when present. The determined cyclic peptides were shown as circles.
