# Supplementary material for: Novel Cyclic Peptides from Lethal Amanita Mushrooms through a Genome-Guided Approach
Source: MDPI journal article supplement (doi:10.3390/jof7030204), 2021-03-11
Supplement: s1 [file s1]

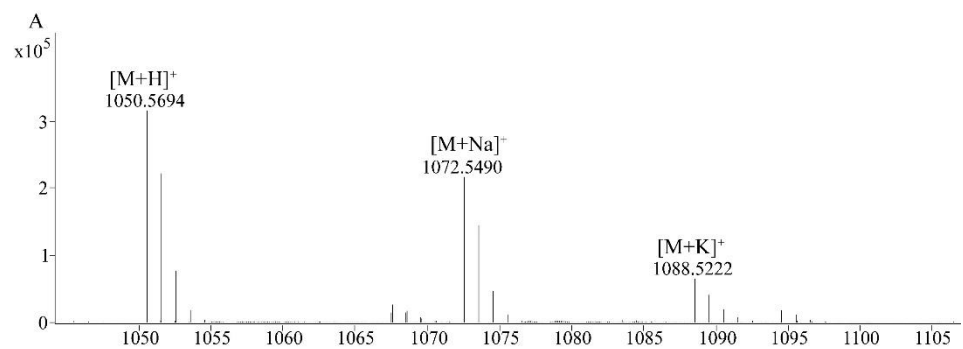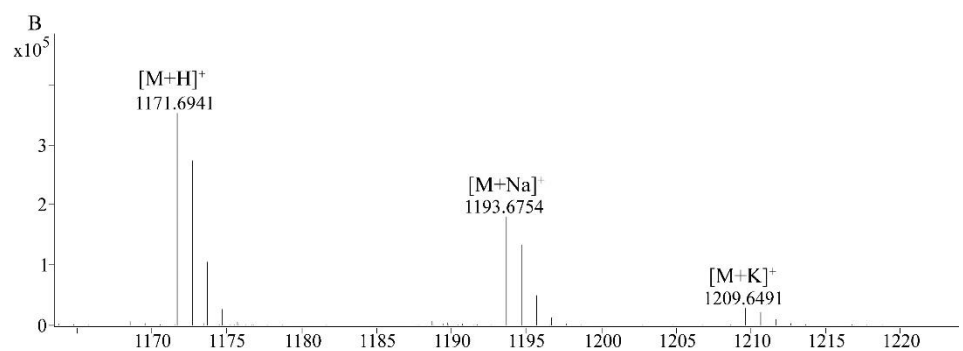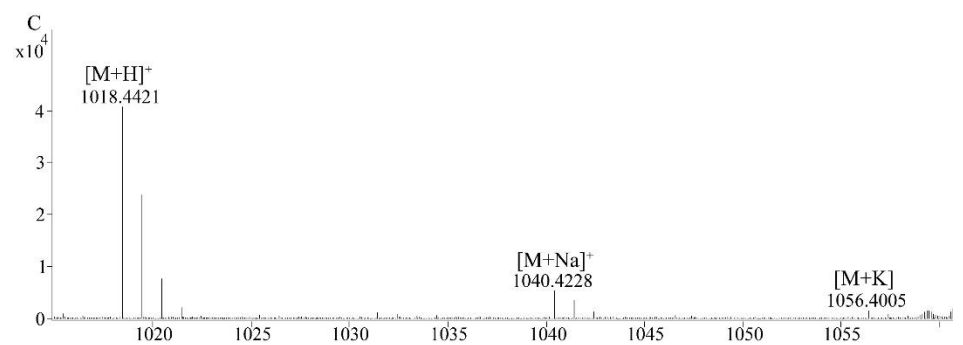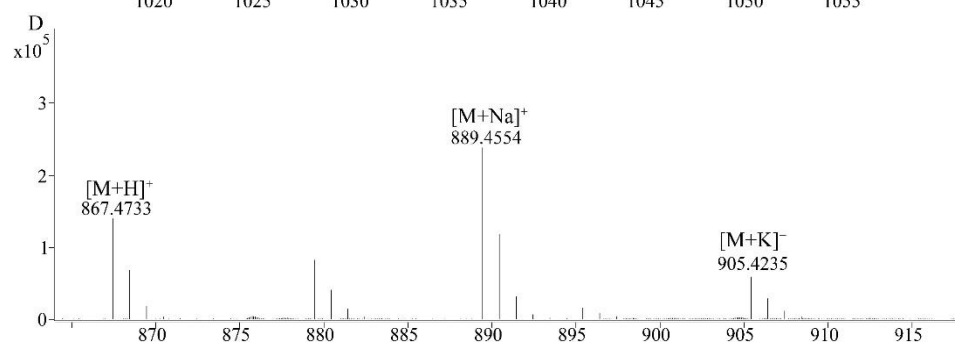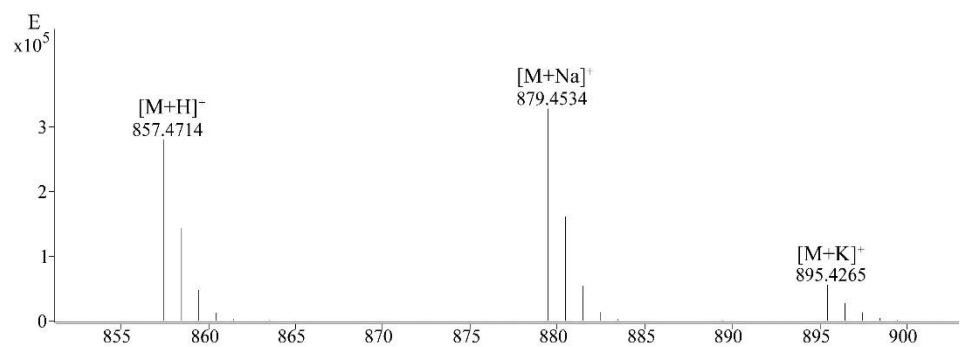

**Fig S3.** The monoisotopic masses of candidate new cyclic peptides in *Amanita pallidorozea*. The five molecules corresponded to the cyclized core peptide sequences of EFIVFGIFP (A), FVIIPPFIFP (B), YFFNDHPP (C), TIHLFSAP (D), and MHILAPPP (E). The adduct ions of  $[M+Na]^+$  and  $[M+K]^+$  were shown in each section.

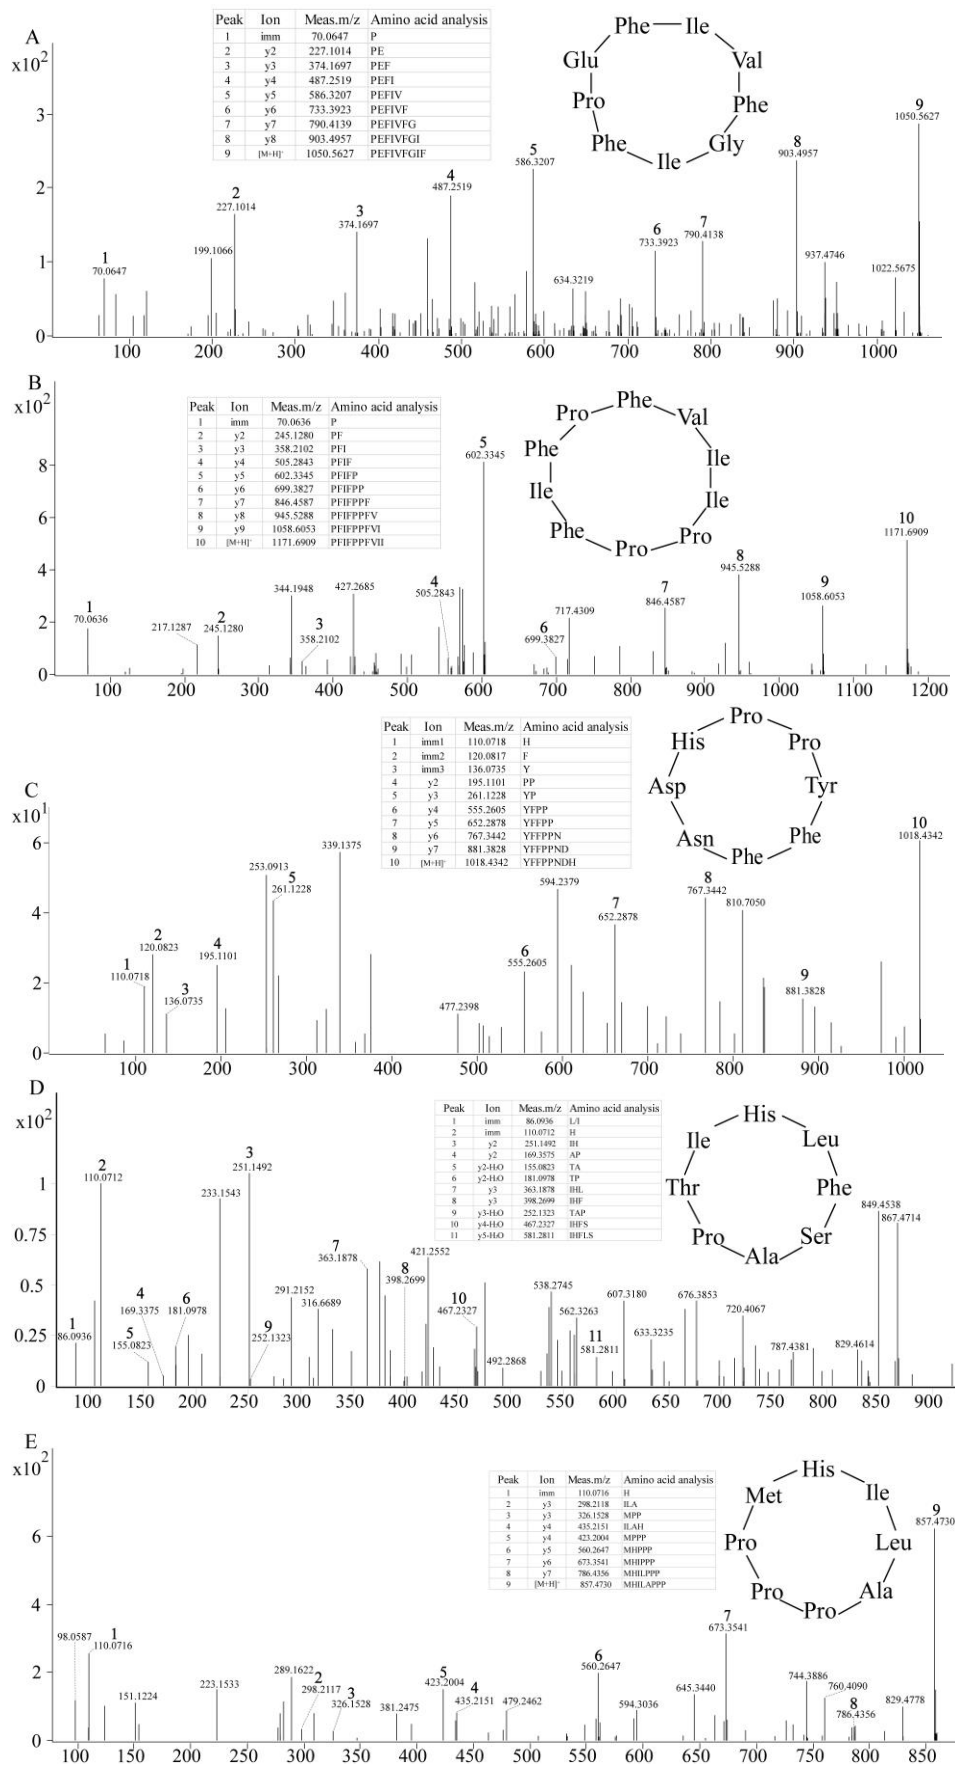

**Fig S4.** Tandem mass spectrometry of novel cyclic peptides in *Amanita pallidorosea*. Manual analysis of amino acid compositions of Cyclo(EFIVFGIFP) (A), Cyclo(FVIIPPFIFP) (B), Cyclo(YFFNDHPP) (C), Cyclo(TIHLFSAP) (D), and Cyclo(MHILAPPP) (E), with inserted tables of matched amino acids; immonium ions were shown when present. The determined cyclic peptides were shown as circles.
