# Supplementary material for: Novel Cyclic Peptides from Lethal Amanita Mushrooms through a Genome-Guided Approach
Source: MDPI journal article supplement (doi:10.3390/jof7030204), 2021-03-11
Supplement: s1 [file s1]

**Table S1.** MSDIN family and novel cyclic peptides in *Amanita pallidorozea*

| Leader Peptide | Core Peptide              | Recognition Sequence | Monoisotopic Mass              |
|----------------|---------------------------|----------------------|--------------------------------|
| MSDINATRLP     | <b>IWGIGCNP</b>           | CVGDEVTALITRGEA      | 918.3541 ( $\alpha$ -amanitin) |
| MSDINATRLP     | <b>IWGIGCNP</b>           | CVGDEVAALLTRGEA      | 918.3541 ( $\alpha$ -amanitin) |
| MSDINATRLP     | <b>IWGIGCDP</b>           | CVGDDVTGVLTRGEA      | 919.3382 ( $\beta$ -amanitin)  |
| MSDVNATRLP     | <b>AWLVDCP</b>            | CVGDDINRLLTRGEK      | 846.3217 (phalloidin)          |
| MSDINATRLP     | <b>AWLMTCP</b>            | CVGDDVNPTLTRGE       | 802.3506                       |
| MSDINASRLP     | <b>AWLATCP</b>            | CAGDDVNPTLTRGE       | 788.3160 (phalloidin)          |
| MSDINATRLP     | <b>DPRRLIP</b>            | GGSDDVDSALTRDE       | 960.5869                       |
| MSDINTARLP     | <b><u>EFIVFGIFP</u>★</b>  | CVGDDIQTVLTRGE       | 1049.5586                      |
| MSDINASRLP     | <b>FFPEVGFFP</b>          | CVGDDTNPILTRG        | 1067.5117                      |
| MSDINTIRVP     | <b>FPWTGPFVP</b>          | CVGDDVGSVLTHGE       | 1028.5120                      |
| MSDINTARLP     | <b><u>FVIIPPFIFP</u>★</b> | CVSDDIEMVLTRGE       | 1170.6841                      |
| MSDINATRLP     | <b>HPFPLGLQP</b>          | CAGDVDNLTTLTRGE      | 986.5338                       |
| MSDINATRLP     | <b>HPFPLGLQP</b>          | CAGDVDNLTTLTRGE      | 986.5338                       |
| MSDINAIRAPLP   | <b>IFSLNP</b>             | CVGDDVEVL            | 671.3643                       |
| MSDINVIRLP     | <b>IFIYFP</b>             | CVGDNIDNTLT          | 780.4210                       |
| MSDINAARLP     | <b>LVYMILFP</b>           | SVGDDIDVVLGRGE       | 976.5456                       |
| MSDINATRLP     | <b>LGRPESLP</b>           | CVGDDVNYILVSG        | 849.4709                       |
| MSDINTARLP     | <b><u>MHILAPPP</u>★</b>   | CVSDDIEMVLTRGE       | 856.4629                       |
| MSDINATRLP     | <b>NWHAGPTRPP</b>         | CVADDVSLTLTRGE       | 1113.5468                      |
| MSDINAARLP     | <b>NLFVWIPP</b>           | CISDDINSTLTRGE       | 966.5327                       |
| MSDINTARLP     | <b>VFFMPPFIPP</b>         | CVSDDIQMVLTRGEK      | 1172.6093                      |
| MSDINTTRLP     | <b><u>YFFNDHPP</u>★</b>   | CASDDIQMVFTTRGE      | 1017.4345                      |
| MSDVNATRLP     | <b>MAFPEFLA</b>           | CVGDDVNHTLTRGE       | 906.4310                       |
| MSDNASRLP      | <b>YFFGFTP</b>            | SVGDDVNPTLTRGE       | 859.3905                       |
| MSDTNATRLP     | <b>SIFIVYPP</b>           | CVSDDVNSTLTRGE       | 916.5058                       |
| MSDMNVRLP      | <b>ISDPTAYP</b>           | CVGDDIQAVLGRGE       | 844.3967                       |
| MSDMNVRLP      | <b>ISDPTAYP</b>           | CVGDDIQAVLGRGE       | 844.3967                       |
| MSDMNTACLP     | <b>IFIVFPIPP</b>          | CVSDDIQTVLTRGE       | 1023.6157                      |
| MSDLNATRLP     | <b>FNLFREFYP</b>          | CIGDDSGSVLTLGEG      | 1181.6022                      |
| MSETNAARLP     | <b><u>TIHLFSAP</u>★</b>   | SVGDDIEVVLGRGE       | 866.4650                       |
| MSNINTARLP     | <b>FLVPSFPP</b>           | CVSDDIQIVLTRGEK      | 884.4796                       |
| MADINASRLP     | <b>LNILPFHLPP</b>         | CVSDDATSTLTRGE       | 1141.6648                      |
| MYDINTTRLP     | <b>HFFNLTPP</b>           | CVRDDI               | 953.4759                       |

<sup>1</sup>★and underlined letters indicate novel cyclic peptides detected with MS and MS/MS.

Predicted monoisotopic masses of cyclic peptides with no further modifications.

<sup>2</sup>The monoisotopic masses are for unmodified cyclic peptides based on MSDIN core peptides, except for major toxins.
