# Supplementary material for: Novel Cyclic Peptides from Lethal Amanita Mushrooms through a Genome-Guided Approach
Source: MDPI journal article supplement (doi:10.3390/jof7030204), 2021-03-11
Supplement: s1 [file s1]

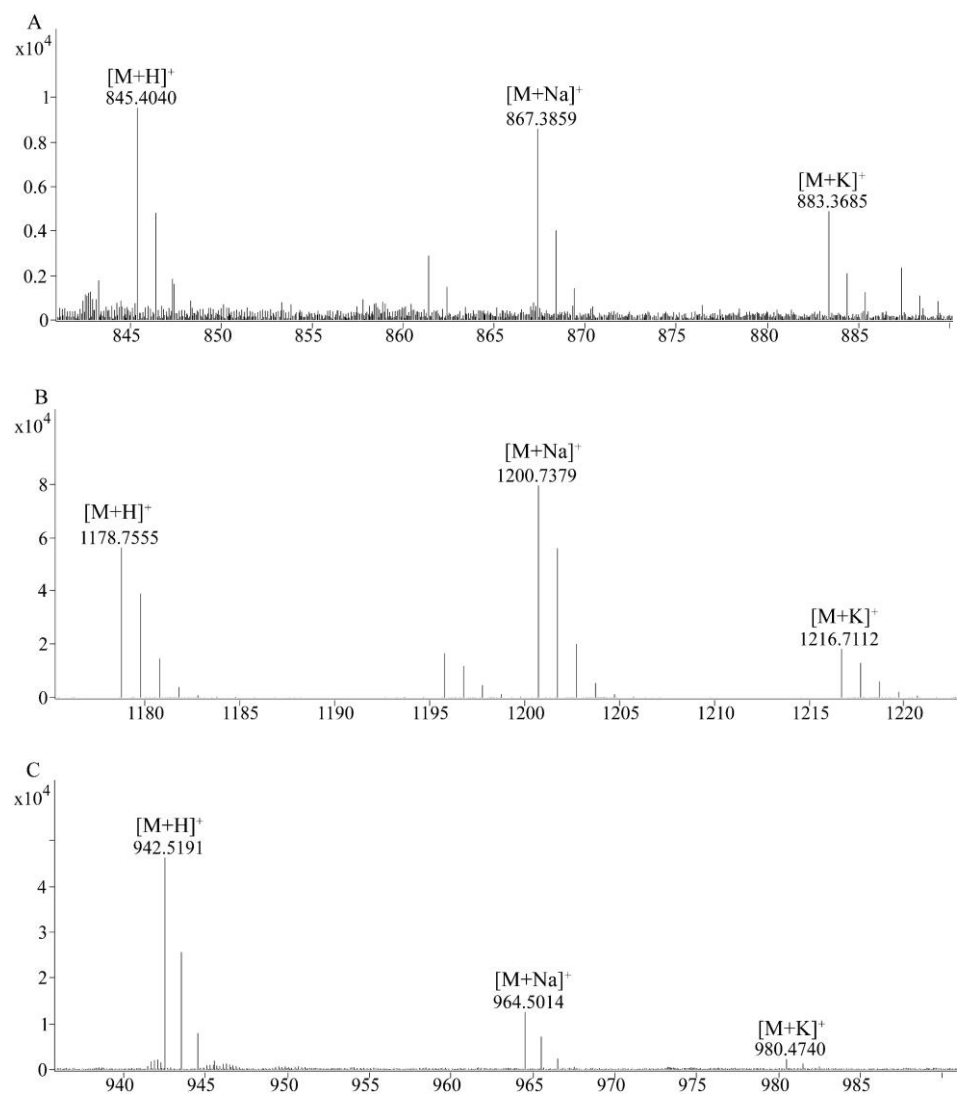

**Fig S1.** The monoisotopic masses of candidate new cyclic peptides in *Amanita rimosa*. The three molecules corresponded to the cyclized core peptide sequences of ISDPTAYP (A), FIPLGIITILP (B) and FPTRPVFP (C). The adduct ions of [M+Na]<sup>+</sup> and [M+K]<sup>+</sup> were shown in each section.

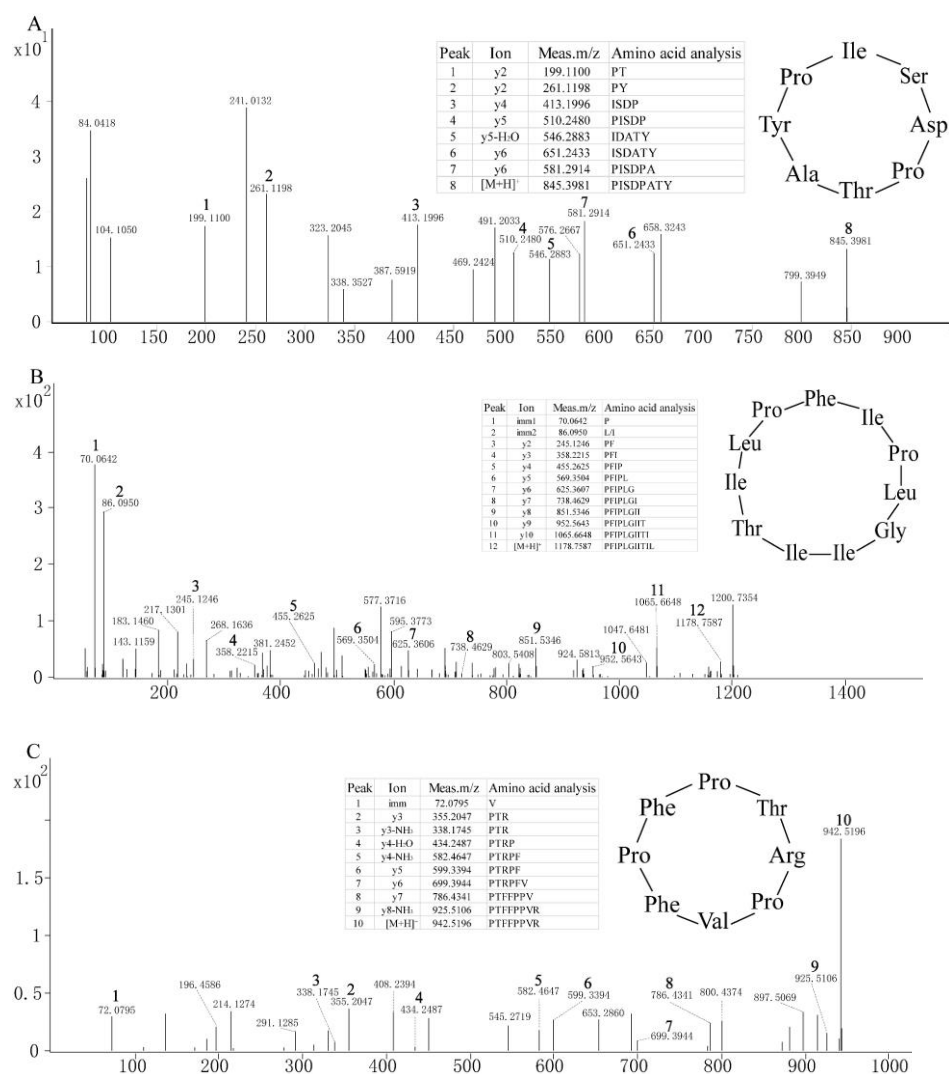

**Fig S2.** Tandem mass spectrometry of novel cyclic peptides in *Amanita rimosa*. Manual analysis of amino acid compositions of Cyclo(ISDPTAYP) (A), Cyclo(FIPLGIITILP) (B) and Cyclo(FPTRPVFP) (C), with inserted tables of matched amino acids; immonium ions were shown when present. The determined cyclic peptides were shown as circles.
