# Supplementary material for: Novel Cyclic Peptides from Lethal Amanita Mushrooms through a Genome-Guided Approach
Source: J Fungi (Basel). 2021 Mar 11;7(3):204. doi: 10.3390/jof7030204 (PMC7998459; doi:10.3390/jof7030204)
Supplement: Supplementary file 1 [file jof-07-00204-s001.zip]

Archive with 5 entries (5 files):
- Additional file 1.pdf
- Additional file 2.pdf
- Additional file 3.pdf
- Additional file 4.pdf
- Additional file 5.pdf
