# Supplementary material for: Novel Cyclic Peptides from Lethal Amanita Mushrooms through a Genome-Guided Approach
Source: J Fungi (Basel). 2021 Mar 11;7(3):204. doi: 10.3390/jof7030204 (PMC7998459; doi:10.3390/jof7030204)
Supplement: Supplementary file 1 [file jof-07-00204-s001.zip › Additional file 4.pdf]

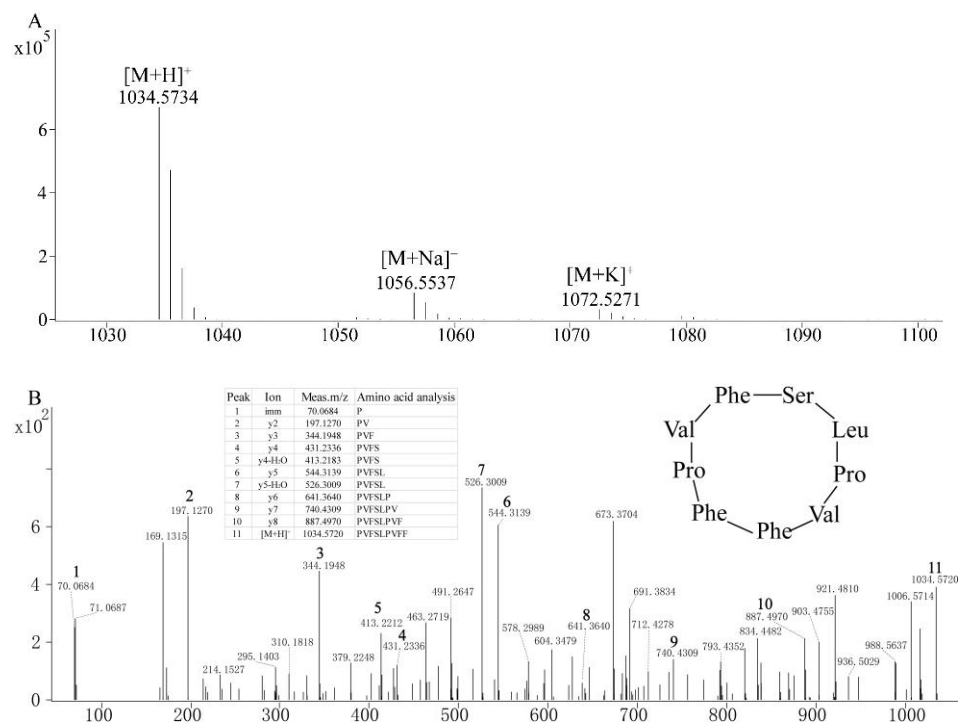

**Fig S7.** Mass spectrometry of amanexitide from *Amanita exitialis*. (A) The molecule corresponded to amanexitide was shown with adduct ions. (B) Manual analysis of amino acid composition of amanexitide with inserted tables of matched amino acids; immonium ions were shown when present. The determined cyclic peptide was shown as a circle.
